# Supplementary material for: Intercomparison of NO x emission inventories over East Asia
Source: Copernicus journal article supplement (doi:10.5194/acp-2017-265), 2017-04-07
Supplement: Supplementary file [file acp-2017-265-AC2-supplement.pdf]

We appreciate reviewer #1 for giving valuable comments. We respond to each specific comment below and indicate what changes we have made in the manuscript. The comments and questions from the referee are in blue and italic font.

*As indicated in the manuscript, some inventories include both anthropogenic and natural sources, but some do not have natural sources such as soil, lightning, and biomass burning, which have large seasonal and inter-annual variabilities. Without carefully segregating natural source contributions to the inventories, a simple comparison of total values among the inventories may cause a serious misunderstanding in their quality.*

*I believe that all bottom-up inventories have sectoral emissions. The top-down emissions with CTMs may have a difficulty to separate individual sources but at least could separate anthropogenic versus natural sources because they have different seasonal variation. Therefore, I suggest that authors should compare inventories including anthropogenic sources alone and then go on to do the similar analysis for natural sources separately if they can.*

Thank you for the suggestion. Based on EDGAR and REAS v2.1, we calculate the ratio of biogenic emissions and the anthropogenic for the study domain. The ratio is about 4.5% and 6.5%, which means that the anthropogenic is the dominant source for the study domain. Separation of the anthropogenic and natural source for the satellite-derived emissions will introduce large uncertainties (larger than the ratio) resulting in an unfair intercomparison at present. On page 10 line 32, we analyze the inconsistency of the intercomparison. For this reason, we have separately analyzed the emissions over urban and rural areas. In section 4.3, we have discussed the different definitions of source categories in the bottom-up inventories.

We add the following discussion in section 3.2 on page 11 line 2:

“The seasonal cycle of the urban grid cells is quite similar to the one shown in Figure 6 for all of mainland China. However, the seasonal cycle for the rural grid cells have a much stronger summer maximum for the inventories that include biogenic emissions”

*Specific comments 1) Page 1, line 30, - I have a hard time to agree with this sentence because it does not appear that they show good agreement in total values.*

We conclude that the total values are in good agreement because the uncertainty of NO<sub>x</sub> emissions of each inventory is also quite large in the current stage. For example, Li et al. (2017) showed that the uncertainty of NO<sub>x</sub> is about ±31% in MIX for China (MEIC). The uncertainty of NO<sub>x</sub> in REAS v2.1 is about ±37% over China (Kurowaka et al. 2013). The standard deviation of total emissions is about 20% for the common year 2008. The distribution is in the range of the uncertainties of these two frequently-used inventories (MIX and REAS v2.1) by modelers for this region. Thus, we conclude that the total values are in good agreement.

We add this discussion on Page 8 line17:

“For comparison, Li et al. (2017) reported typical uncertainties of 31 to 37 % for bottom-up inventories over China.”

*2) Page 2, line 1, - There must be some typos here.*

We noticed that the first part of the sentence was missing on Page 4.

We add the missing part in the paper:

“In this study, we compare the satellite-derived inventories from DECSO and EnKF with a...”

3) Section 2 – I believe that each inventory typically has a base year from which it projects values for other years based on some proxy data. If there is available information on this, please state it in the manuscript.

According to our information, all bottom-up inventories in our paper use full time series of the emission activity data. They all calculate the emissions from year to year and they don't use projection. However, the spatial proxy data that it uses for the geospatial distribution does not vary a lot in time. To avoid confusion, we prefer not to mention this detailed information in our paper.

4) Page 6, line 15 – CHIMERE has a top layer at 500 hPa, which is too low to account for lightning NO<sub>x</sub> emission. So in the inverse modeling with CHIMERE, how would lightning NO<sub>x</sub> contribution to the observations be taken into account? I would assume that a climatological partial column would not change with time.

The DECSO algorithm underestimates lightning emissions for those reasons. The algorithm is not able to capture the emissions with temporary changes less than one day, such as lightning emissions. This has been discussed in the paper of Ding et al. (2017). In the manuscript (page 12 line 32), we explained: “In DECSO algorithm, the NO<sub>2</sub> concentrations above 500hpa were obtained from climatological data, and the lightning emissions are identified as surface emissions.”

For clarification, we add the following text on page 6 line 20:

“NO<sub>x</sub> emissions detected with DECSO are regarded as total surface emissions. Note that the algorithm is not able to capture the emission with temporary changes less than one day.”

5) Page 6, line 28 – Obviously, there is a difference in the pixel sizes of satellite observations, which also differ from the model resolution. A detailed information on this would be necessary in the manuscript. How would this difference cause a discrepancy in the DECSO data with each satellite observation?

We project the model grid cells on the satellite footprint in DECSO. For large areas, the effect of different footprint size is averaged out. The different total emissions derived from the two satellite instruments are mainly caused by the different overpass time of satellites and the diurnal cycle in the model (see point 8). The effect of the pixel sizes of satellite observations is mainly for small areas with inhomogeneous land-use. The resolution of emissions cannot be higher than the satellite pixel size.

6) Page 7, line 35 – revision is required for clarity.

We change the sentence to:

“For the comparison, the monthly emissions on 2.8° resolution from EnKF-CHASER and EnKF-MIROC are redistributed to a horizontal resolution of 0.25° × 0.25° based on emission distributions of the a priori inventory MIX. Note that the shipping emissions near the coast areas are added to land since they are not included in MIX.”

7) Page 8, line 10 – Could you explain the reason for the discrepancy here?

The possible reasons are related to the uncertainties in model diurnal cycles and satellite observations, which are discussed in section 4.4.

8) Page 9, line 30 – How would the difference in the local overpass time and pixel size make a difference in the seasonality of inferred emissions? It is not clear to me at all.

We have explained this in the discussion part.

“The OMI satellite instrument with an overpass time in the afternoon will observe more NO<sub>2</sub> from biomass burning than the GOME-2 instrument with its morning overpass time, because of stronger biomass burning activities and high soil emissions in the afternoon (Boersma et al., 2008). This can explain why only the satellite-derived emission inventories based on OMI show a clear summer peak.”

9) Page 10, line 29 – *“Biases” would not be appropriate because we don’t know the true. I would suggest to use “differences” instead.*

We change it to ‘difference’

10) Page 10, line 32 – *How about lightning?*

We have neglected lightning emissions in the whole analysis. The datasets from EnKF are only surface emissions. The lightning part of EnKF is not used in this study. The DECSO algorithm underestimates lightning emissions. Lightning emissions are shorter time scale and are averaged out in the monthly emissions.

11) Page 11, line 7 – *It appears to me the same as in Figure 7.*

Figure 9 shows the emissions over the urban area, which is different from the total emissions shown in Figure 7. Since the emissions over the urban area are dominant (about 50% of the total emissions), these look similar. However, the influences of rural emissions are not negligible, and it is worth showing Figure 9.

12) Page 14, line 21 – *It makes me wonder if two simulated NO<sub>2</sub> concentrations also show a similar or greater magnitude of differences as shown in the top-down emissions.*

The difference of NO<sub>2</sub> concentrations simulated by CHASER and MIROC is about 10% over this region.
